# Supplementary material for: Novel fluorescence sensor for the selective recognition of tetracycline based on molecularly imprinted polymer-capped N-doped carbon dots
Source: Royal Society of Chemistry journal article supplement (doi:10.1039/d2ra03923k), 2022-01-01
Supplement: d2ra03923k1.pdf [file d2ra03923k1.pdf]

## Supplementary Information

### **Novel fluorescence sensor for the selective recognition of tetracycline based on molecularly imprinted polymer-capped N-doped carbon dots**

Qihui Wang<sup>a</sup>, Yiwen Wu<sup>a</sup>, Xumei Bao<sup>a</sup>, Min Yang<sup>a</sup>, Jun Liu<sup>b</sup>, Kang Sun<sup>a</sup>, Zhonghui Li<sup>a\*</sup>, Guowei Deng<sup>a\*</sup>

<sup>a</sup>College of Chemistry and Life Science, Sichuan Provincial Key Laboratory for Structural Optimization and Application of Functional Molecules, Chengdu Normal University, Chengdu, 611130, China.

<sup>b</sup>Sichuan Key Laboratory of Medical Imaging & Department of Chemistry, School of Preclinical Medicine, North Sichuan Medical College, Nanchong, 637000, China

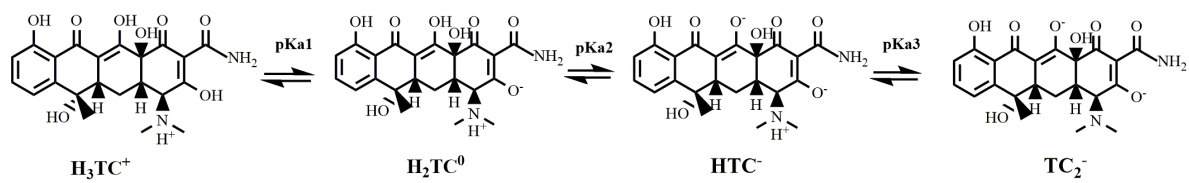

**Fig. S1** pH-dependent speciation of TC

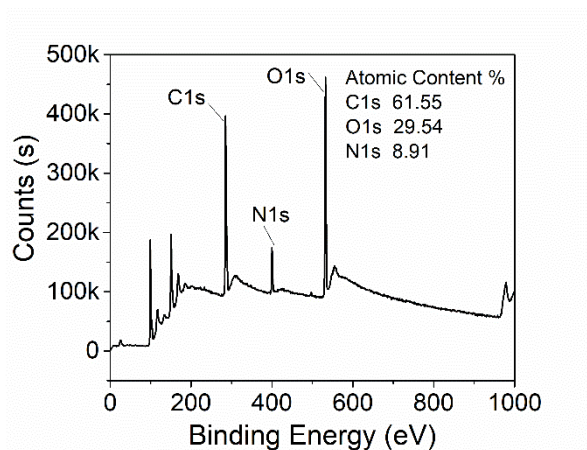

**Fig. S2** The full-scan XPS spectra in N-CDs

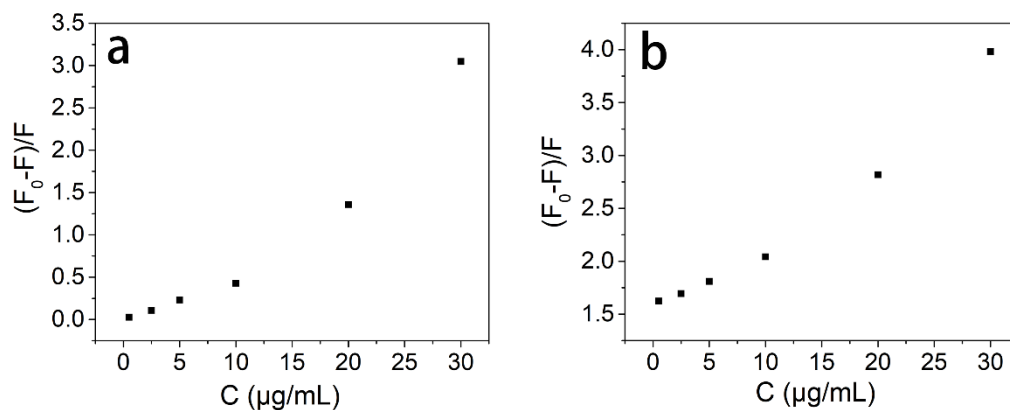

**Fig. S3** The relationship between  $(F_0 - F)/F$  of CDs-MIPs (a), CDs-NIPs (b) and concentrations of TC (0.5, 2.5, 5, 10, 20, 30  $\mu\text{g mL}^{-1}$ ).  $F$  and  $F_0$  indicate the fluorescence intensity signals with and without TC, respectively. The emission intensity signals at 455 nm ( $\lambda_{\text{ex}} = 360$  nm) with the voltage of 600 V has been experimented.

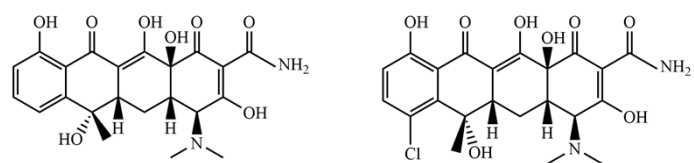

TC

CTC

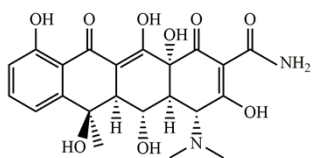

OTC

**Fig. S4** Chemical structures of TC, CTC and OTC.

**Table S1** The strength of the peaks of XPS for CDs-MIPs.

| Name | Peak BE | Height CPS | FWHM eV | Area (P) CPS.eV | Atomic % |
|------|---------|------------|---------|-----------------|----------|
| C1s  | 285.87  | 25599.94   | 3.24    | 89824.42        | 23.33    |
| N1s  | 399.21  | 940.02     | 1.41    | 5004.1          | 0.84     |
| O1s  | 532.46  | 272135.46  | 1.6     | 498343.93       | 53.55    |
| Si2p | 102.97  | 44576.26   | 1.74    | 86146.71        | 22.28    |

**Table S2** The strength of the peaks of XPS for CDs-MIPs+TC.

| Name | Peak BE | Height CPS | FWHM eV | Area (P) CPS.eV | Atomic % |
|------|---------|------------|---------|-----------------|----------|
| C1s  | 285.85  | 28170.56   | 2.11    | 94191.18        | 24.33    |
| N1s  | 399.99  | 978.64     | 0.34    | 4992.91         | 0.83     |
| O1s  | 532.37  | 262606.78  | 1.66    | 501585.08       | 53.59    |
| Si2p | 102.9   | 40691.48   | 1.8     | 82593.53        | 21.25    |
